# Supplementary material for: Autofluorescence signatures for classifying lung cells during epithelial mesenchymal transition
Source: Royal Society of Chemistry journal article supplement (doi:10.1039/c6ra16866c), 2016-01-01

Electronic Supplementary Information

**Autofluorescence Signatures for Classifying Lung Cells during Epithelial Mesenchymal Transition: A Preliminary Report**

*Atasi Sarkar<sup>\*,1</sup>, Ananya Barui<sup>2</sup>, Biswajoy Ghosh<sup>1</sup>, Anirban Mukherjee<sup>3</sup>, Ripon Sarkar<sup>2</sup>, Sanghamitra Sengupta<sup>4</sup>, and Jyotirmoy Chatterjee<sup>1</sup>*

\*Corresponding Author E-mail: [atasi181@gmail.com](mailto:atasi181@gmail.com)

<sup>1</sup>School of Medical Science and Technology, Indian Institute of Technology Kharagpur, Kharagpur- 721302, West Bengal, India

<sup>2</sup>Centre for Healthcare Education, Science and Technology, Indian Institute of Engineering Science and Technology, Shibpur- 711103, West Bengal, India

<sup>3</sup>Department of Electrical Engineering, Indian Institute of Technology Kharagpur, Kharagpur- 721302, West Bengal, India

<sup>4</sup>Department of Biochemistry, Calcutta University, Ballygunge, Kolkata- 700019, West Bengal, India

Supplementary Figures

**Fig S1:** F-actin (upper panel) and Vimentin (lower panel) immuno-cytochemical expression of L132 control cells at different time points from 24 hours to 72 hours. (Scale bar = 50  $\mu$ m)

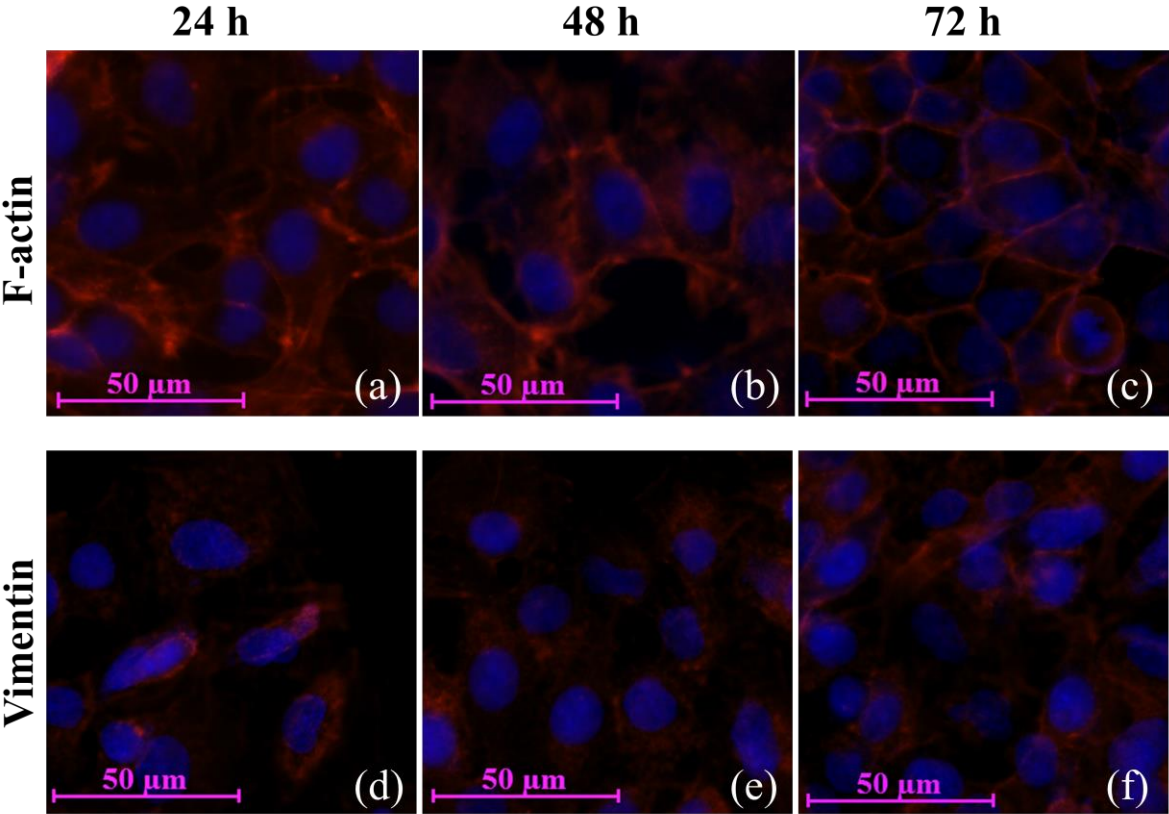

**Fig S2:** Autofluorescence expression of L132 control cells at different time points from 24 hours to 72 hours. (Scale bar = 100  $\mu$ m)

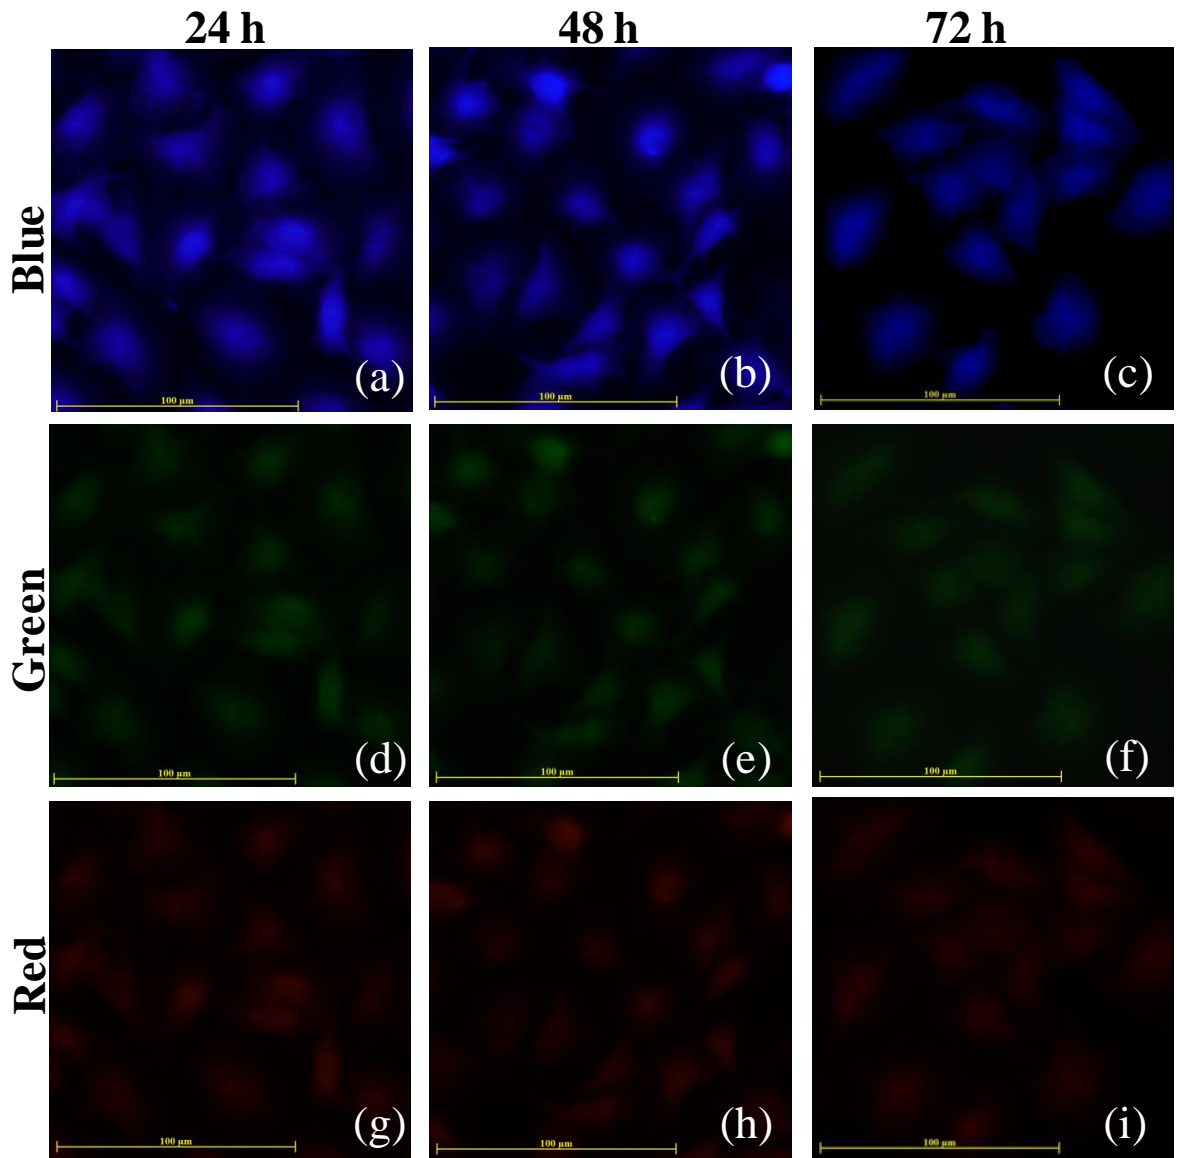

**Fig S3:** Graphs representing shape (a), autofluorescence (b-d) and cytoskeletal (e, f) features of L132 control cells grown till 72 hours. Insignificant differences in cellular features recorded for cells at different temporal point of growth. The p-value < 0.01 was considered as statistically significant. (ns = insignificant, cell number at each point= 500)

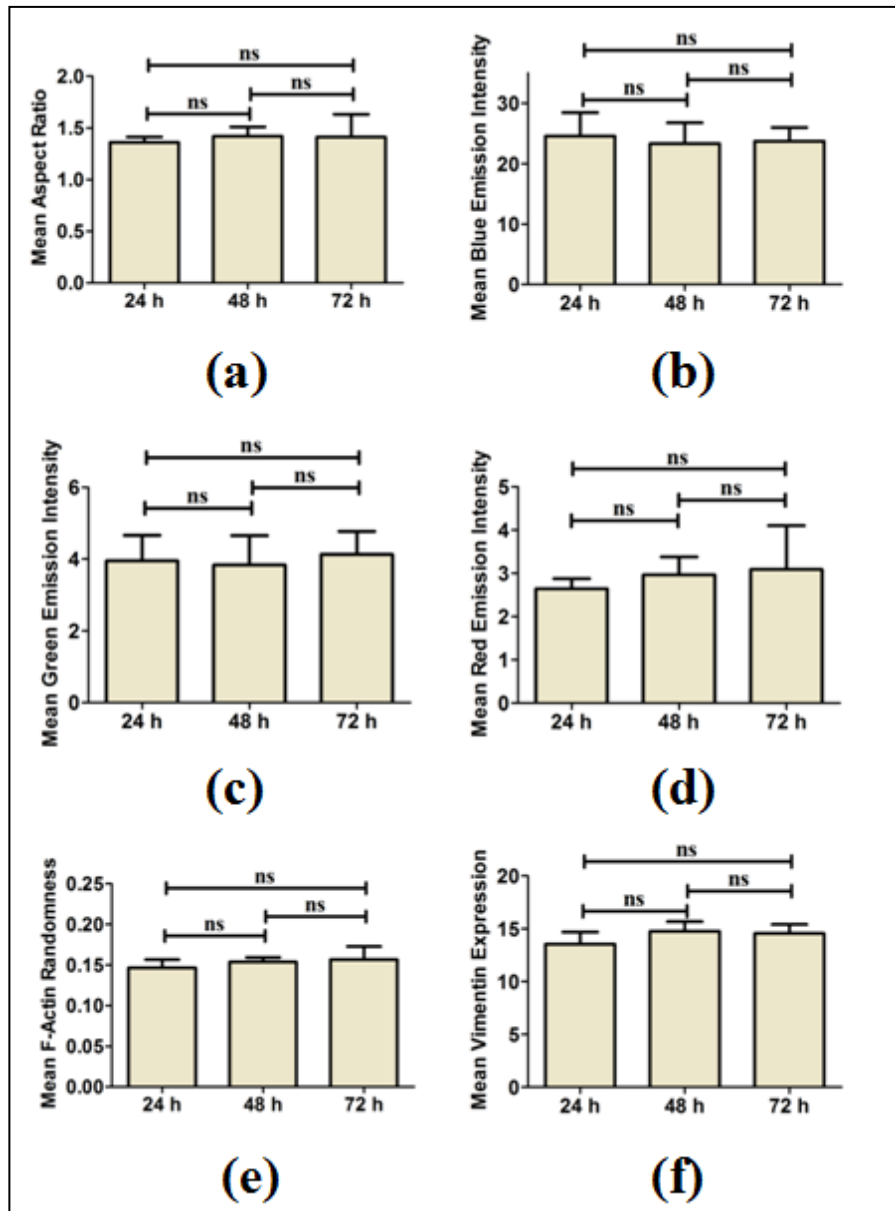

**Fig S4:** F-actin (upper panel) and Vimentin (lower panel) immuno-cytochemical expression of A549 control cells at different time points from 24 hours to 72 hours. (Scale bar = 50  $\mu\text{m}$ )

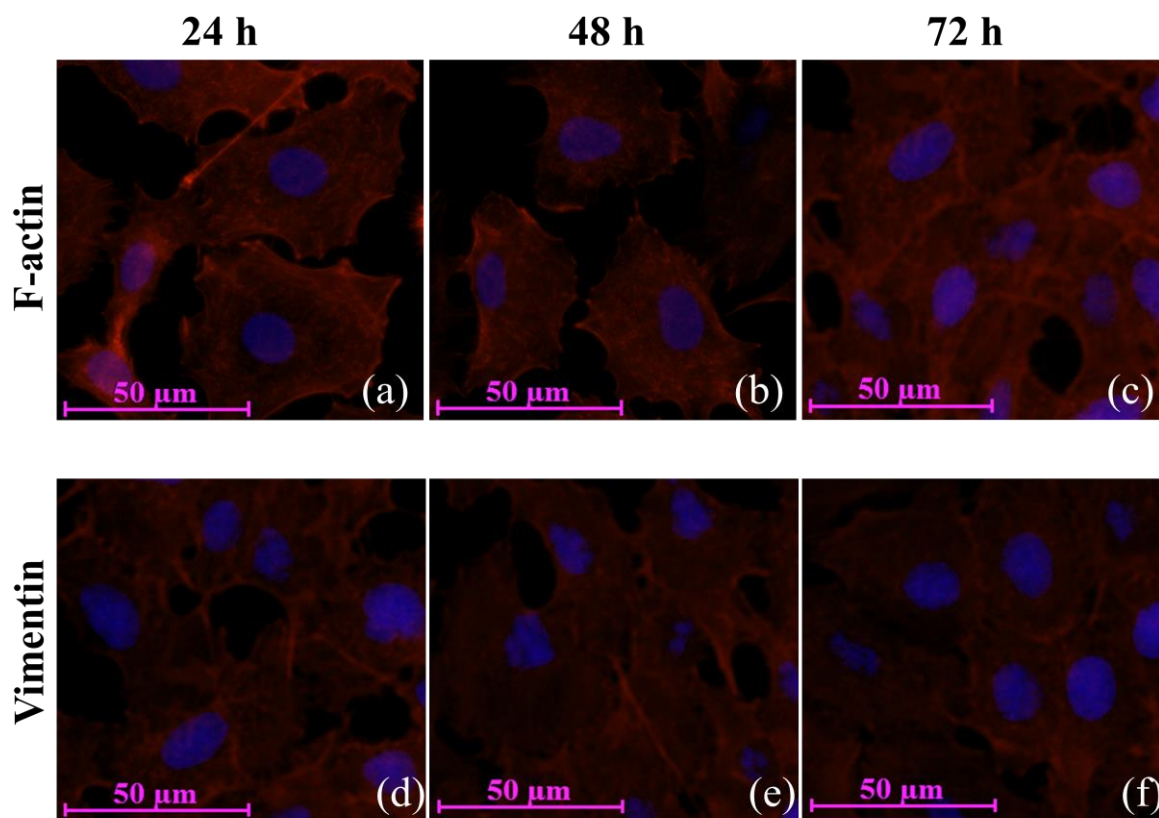

**Fig S5:** Autofluorescence expression of A549 control cells at different time points from 24 hours to 72 hours. (Scale bar = 100  $\mu$ m)

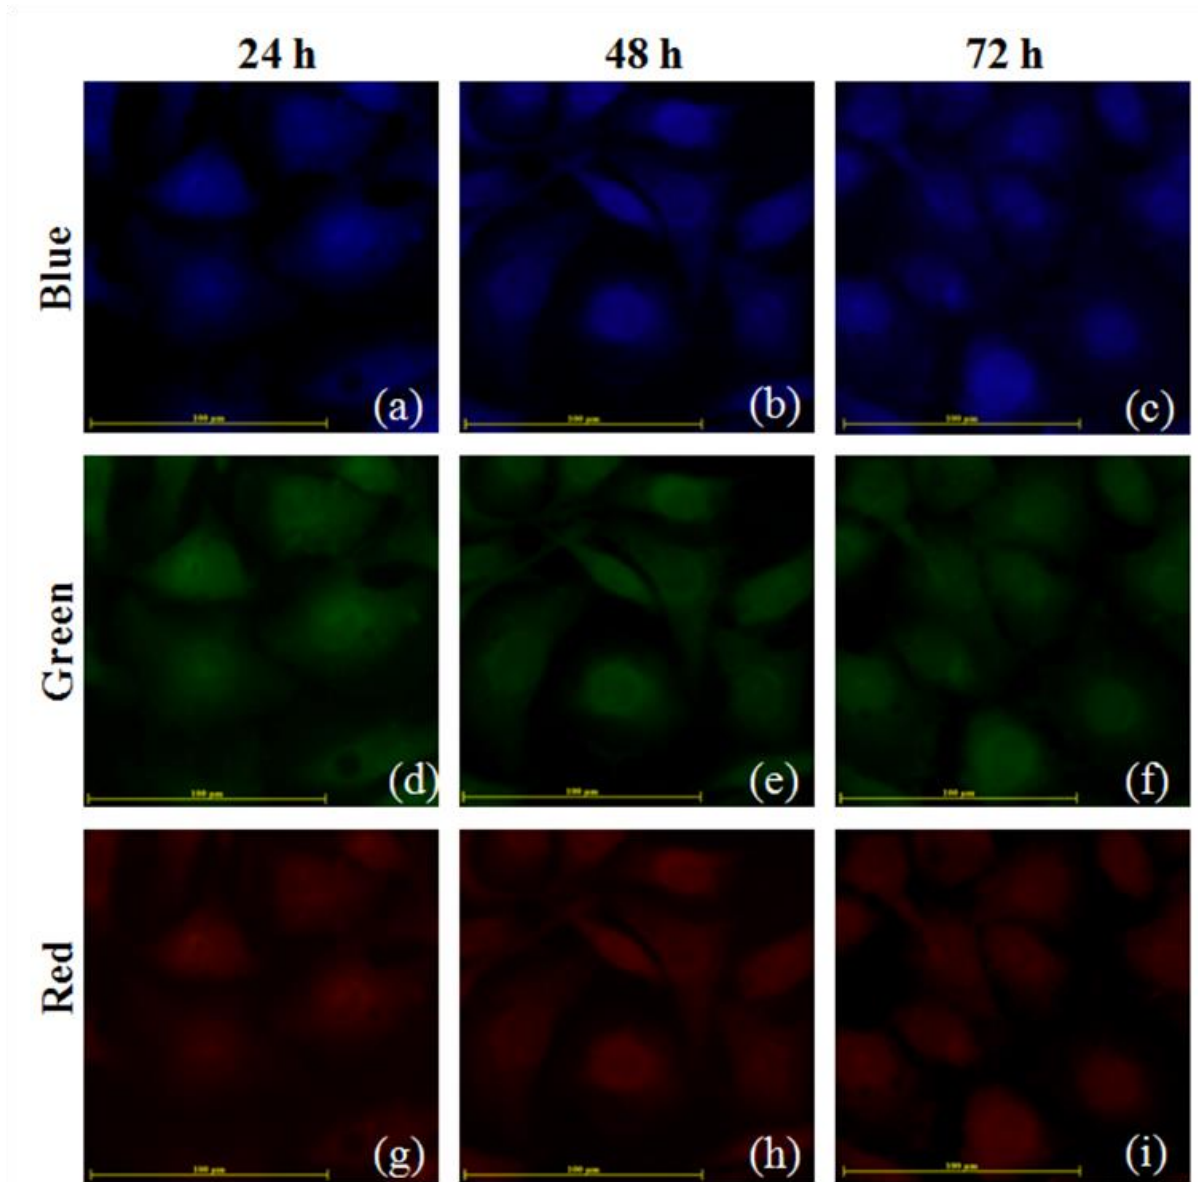

**Fig S6:** Graphs representing shape (a), autofluorescence (b-d) and cytoskeletal (e. f) features of A549 control cells grown till 72 hours. Insignificant differences in cellular features recorded for cells at different temporal point of growth. The p-value < 0.01 was considered as statistically significant. (ns = insignificant, cell number at each point= 500)

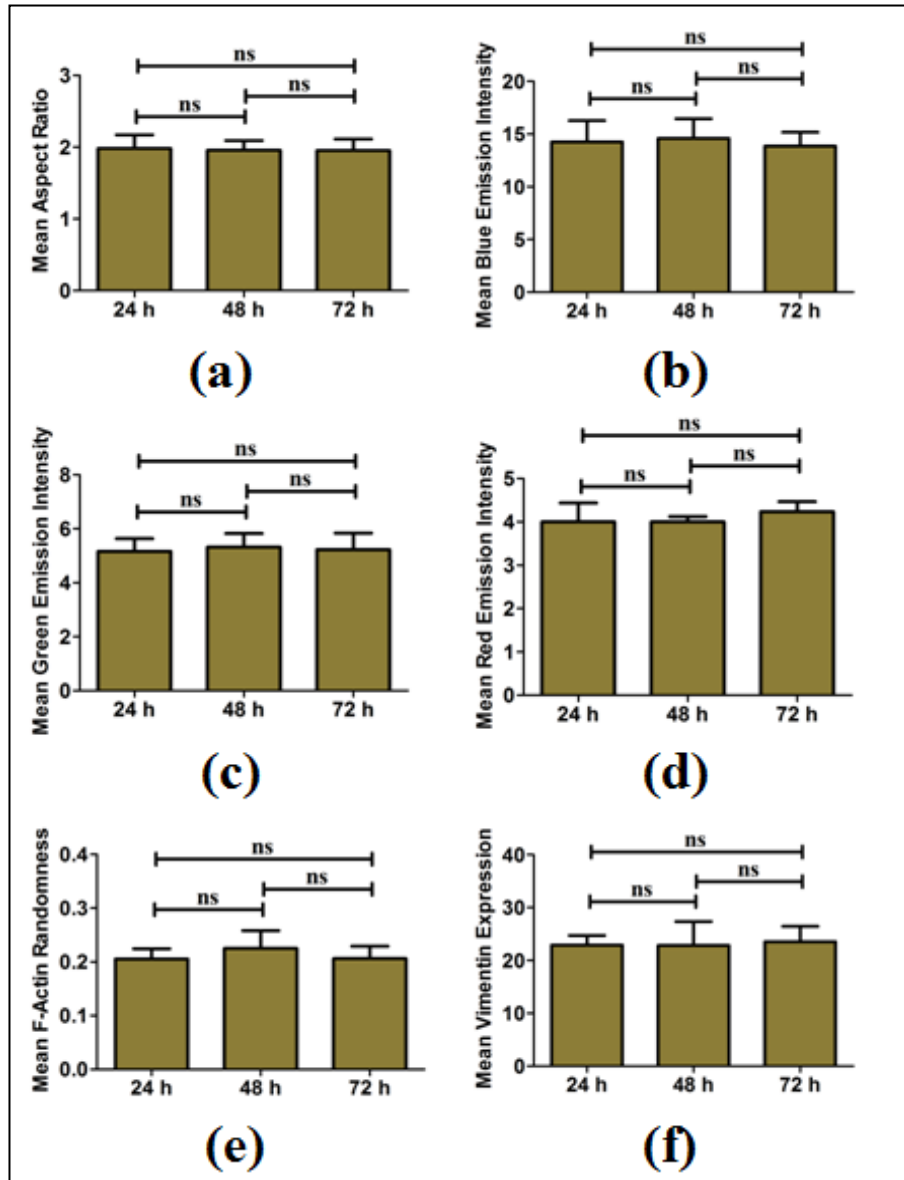

Supplement: c6ra16866c1.pdf [file c6ra16866c1.pdf]
